# Supplementary material for: Extraction of Gold Based on Ionic Liquid Immobilized in UiO-66: An Efficient and Reusable Way to Avoid IL Loss Caused by Ion Exchange in Solvent Extraction
Source: MDPI journal article supplement (doi:10.3390/molecules28052165), 2023-02-25
Supplement: s1 [file s1]

## Supplementary Information

### 1. Synthesis of UiO-66

1.165 g  $\text{ZrCl}_4$ , 0.831 g TPA, 0.875 mL of HCl, and 29.3 mL of DMF were mixed in a teflon-lined stainless steel autoclave. The mixture was heated at  $180^\circ\text{C}$  for 24 h. The resultant UiO-66 was further purified by mixing UiO-66 with DMF (1 g UiO-66 to 50 mL DMF) in a teflon-lined stainless steel autoclave, and the mixture was heated at  $150^\circ\text{C}$  for 5 h and then filtered and rinsed with distilled water. Finally, the obtained UiO-66 were oven-dried at  $150^\circ\text{C}$  for 12 h.

### 2. SEM image of UiO-66 and $[\text{HMIIm}]^+[\text{BF}_4]^-@ \text{UiO-66}$

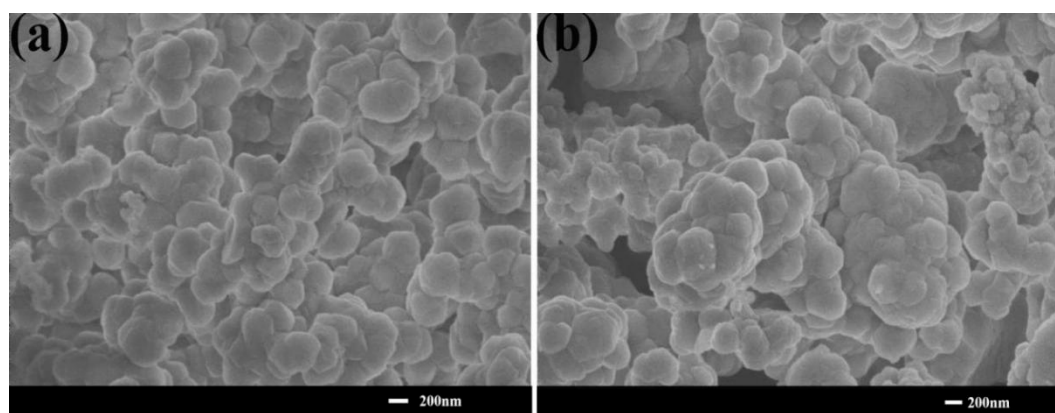

**Supplementary Figure S1.** (a) SEM image of UiO-66; (b) SEM image of  $[\text{HMIIm}]^+[\text{BF}_4]^-@ \text{UiO-66}$ .

### 3. $\text{BF}_4^-$ ion chromatogram

#### 3.1 $\text{BF}_4^-$ ion chromatogram in water under different conditions

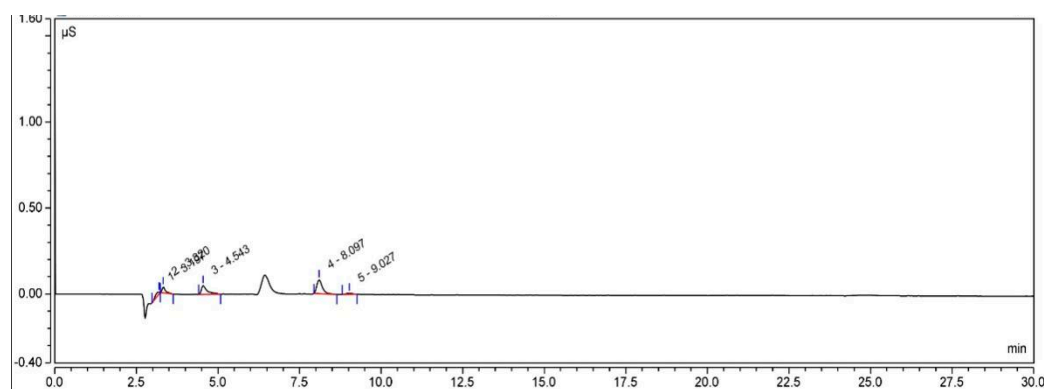

**Supplementary Figure S2.**  $\text{BF}_4^-$  ion chromatogram: (a) DI water.

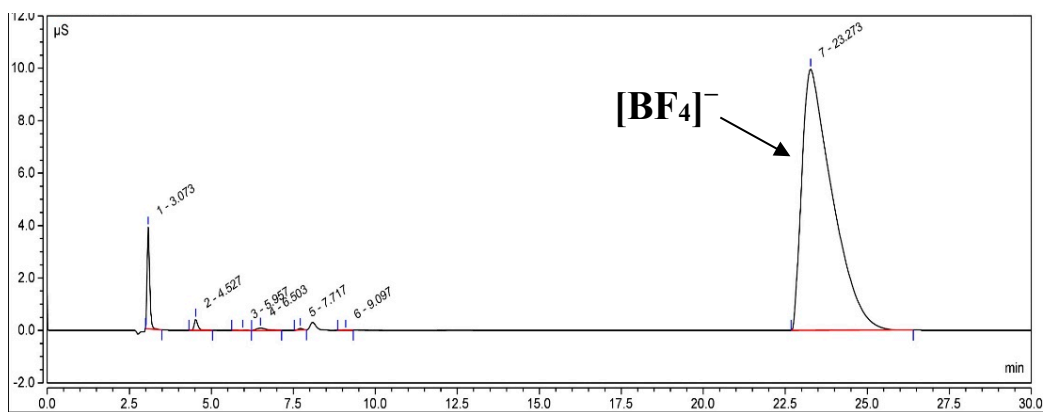

(b)  $\text{NaBF}_4$  (100 mg/L).

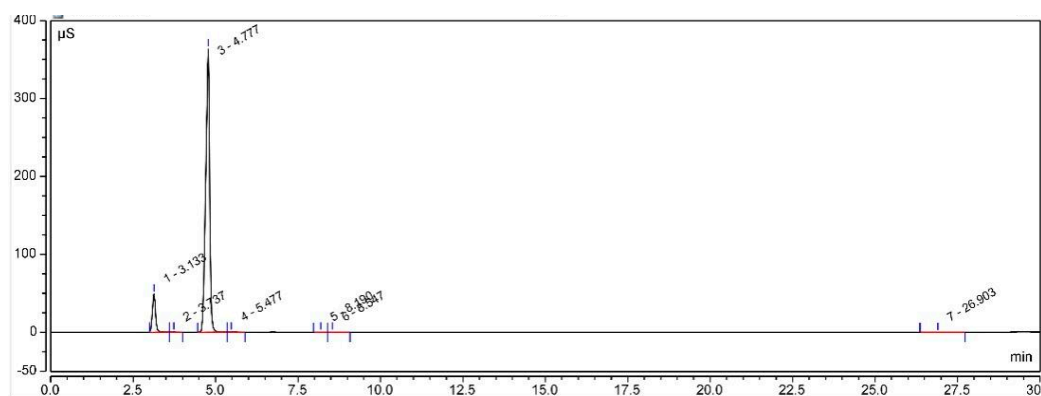

(c) The supernatant after adsorption of the 0 mg/L  $\text{Au(III)}$  solutions on the  $[\text{HMIm}]^+[\text{BF}_4]^-@ \text{UiO}-66$  at pH 2 ( $m_{[\text{HMIm}]^+[\text{BF}_4]^-@ \text{UiO}-66} = 10 \text{ mg}$ ,  $V_{\text{Au(III)}} = 10 \text{ mL}$ ,  $T = 35^\circ\text{C}$ ,  $t = 6 \text{ h}$ ).

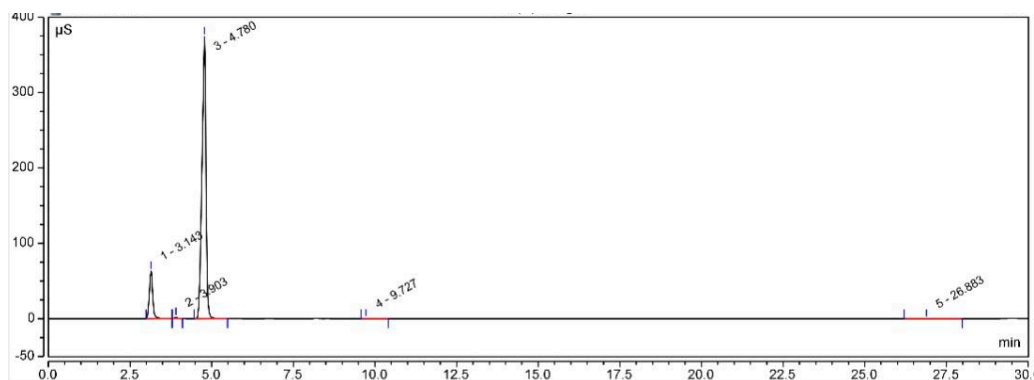

(d) The supernatant after adsorption of the 150 mg/L  $\text{Au(III)}$  solutions on the  $[\text{HMIm}]^+[\text{BF}_4]^-@ \text{UiO}-66$  at pH 2 ( $m_{[\text{HMIm}]^+[\text{BF}_4]^-@ \text{UiO}-66} = 10 \text{ mg}$ ,  $V_{\text{Au(III)}} = 10 \text{ mL}$ ,  $T = 35^\circ\text{C}$ ,  $t = 6 \text{ h}$ ).

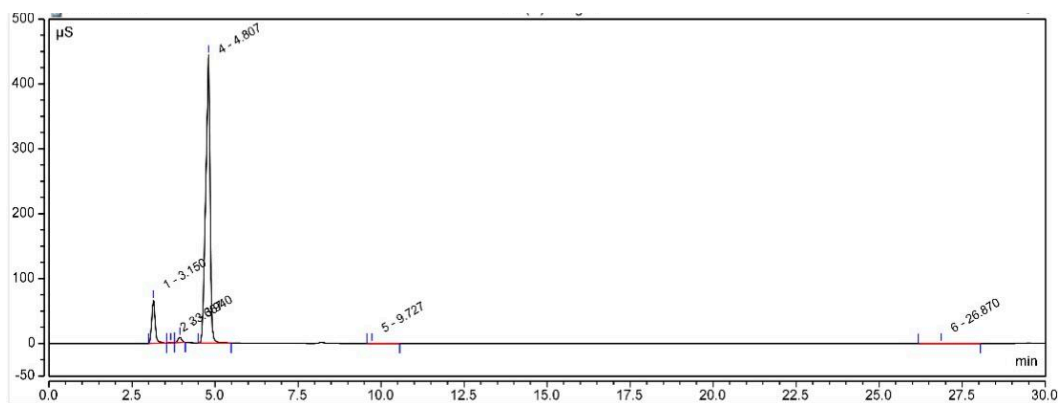

(e) The supernatant after adsorption of the 300 mg/L Au(III) solutions on the [HMIm]<sup>+</sup>[BF<sub>4</sub>]<sup>-</sup>@UiO-66 at pH 2 ( $m_{[\text{HMIm}]^+[\text{BF}_4]^-@ \text{UiO-66}}=10 \text{ mg}$ ,  $V_{\text{Au(III)}}=10 \text{ mL}$ ,  $T=35^\circ\text{C}$ ,  $t=6 \text{ h}$ ).

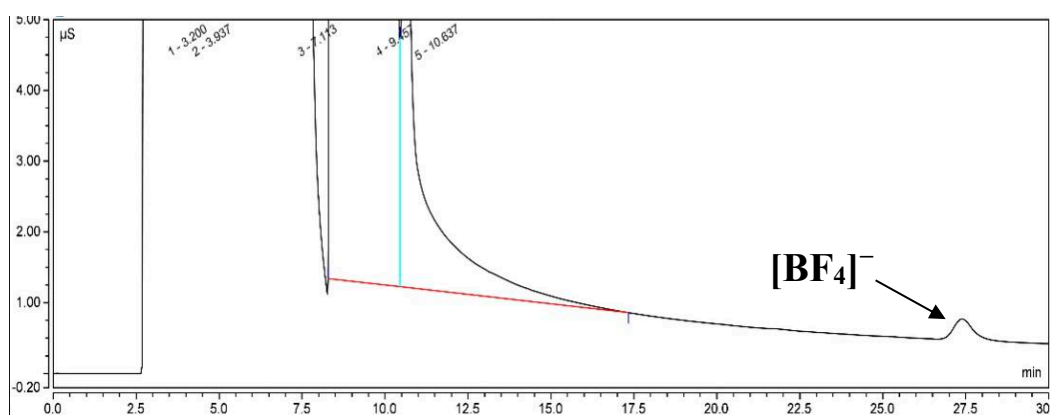

(f) The supernatant after adsorption of the 150 mg/L Au(III) solutions on the [HMIm]<sup>+</sup>[BF<sub>4</sub>]<sup>-</sup>@UiO-66 at aqua regia after diluted 10 times (HCl: 1.2 mol/L, and HNO<sub>3</sub>: 1.6 mol/L) ( $m_{[\text{HMIm}]^+[\text{BF}_4]^-@ \text{UiO-66}}=10 \text{ mg}$ ,  $V_{\text{Au(III)}}=10 \text{ mL}$ ,  $T=35^\circ\text{C}$ ,  $t=6 \text{ h}$ ).

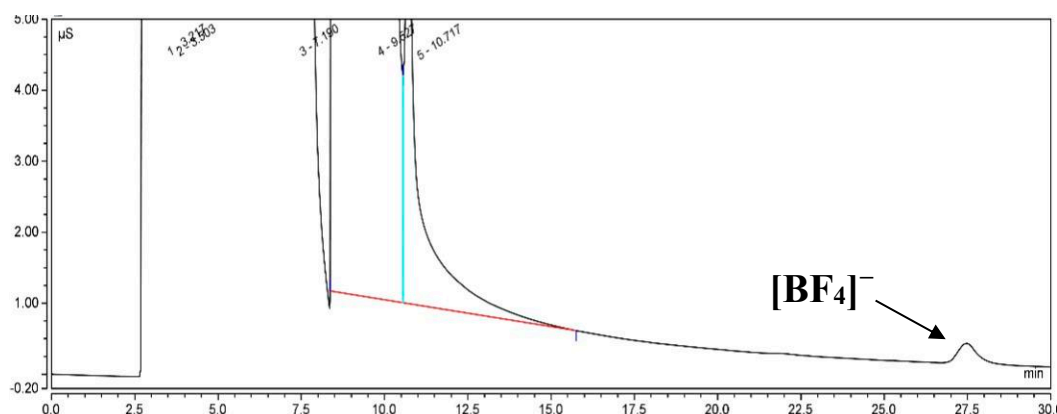

(g) The supernatant after adsorption of the 300 mg/L Au(III) solutions on the [HMIm]<sup>+</sup>[BF<sub>4</sub>]<sup>-</sup>@UiO-66 at aqua regia after diluted 10 times (HCl: 1.2 mol/L, and HNO<sub>3</sub>: 1.6 mol/L) ( $m_{[\text{HMIm}]^+[\text{BF}_4]^-@ \text{UiO-66}}=10 \text{ mg}$ ,  $V_{\text{Au(III)}}=10 \text{ mL}$ ,  $T=35^\circ\text{C}$ ,  $t=6 \text{ h}$ ).

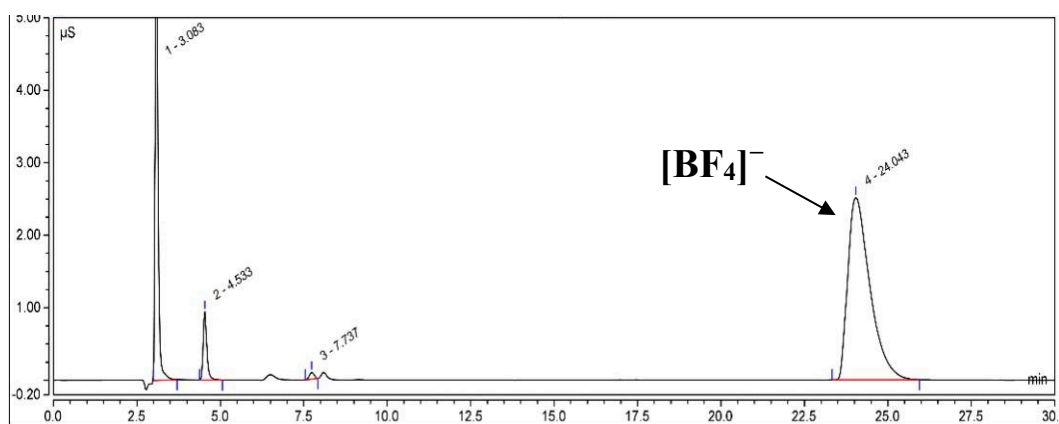

(h) The supernatant after extraction of the 150 mg/L Au(III) solutions from [HMIm]<sup>+</sup>[BF<sub>4</sub>]<sup>-</sup> (measured after dilution 1000) at pH 2 ( $V_{[\text{HMIm}]^+[\text{BF}_4]^-} = 1 \text{ mL}$ ,  $V_{\text{Au(III)}} = 10 \text{ mL}$ ,  $T = 35^\circ\text{C}$ ,  $t = 6 \text{ h}$ ).

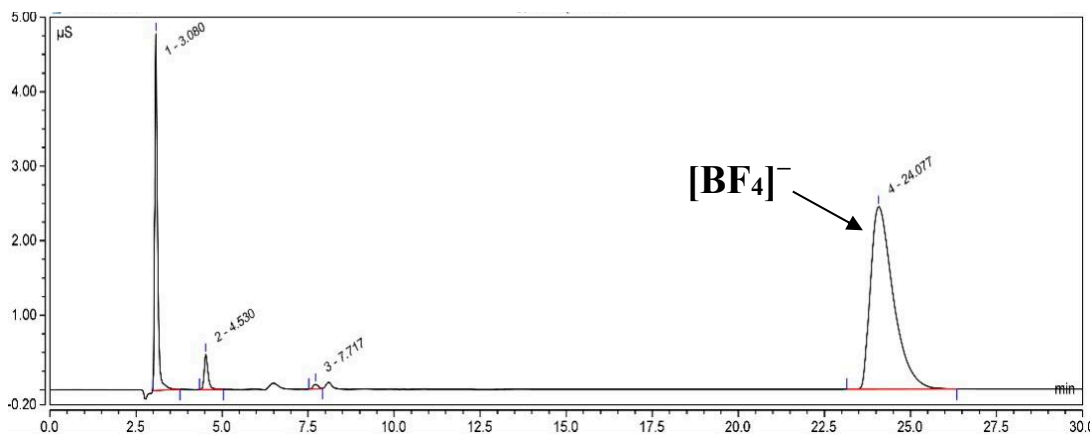

(i). The supernatant after extraction of the 300 mg/L Au(III) solutions from [HMIm]<sup>+</sup>[BF<sub>4</sub>]<sup>-</sup> (measured after dilution 1000) at pH 2 ( $V_{[\text{HMIm}]^+[\text{BF}_4]^-} = 1 \text{ mL}$ ,  $V_{\text{Au(III)}} = 10 \text{ mL}$ ,  $T = 35^\circ\text{C}$ ,  $t = 6 \text{ h}$ ).

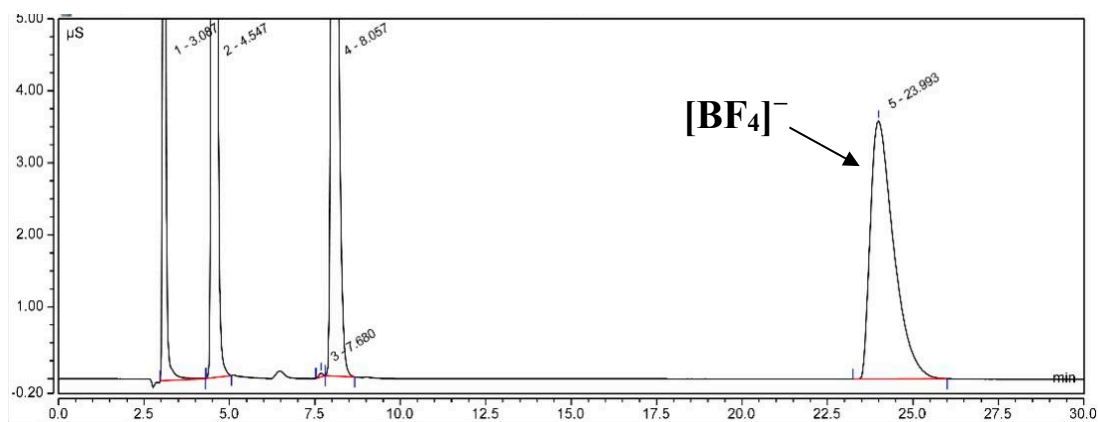

(j) The supernatant after extraction of the 150 mg/L Au(III) solutions from [HMIm]<sup>+</sup>[BF<sub>4</sub>]<sup>-</sup> (measured after dilution 1000) at aqua regia after diluted 10 times (HCl: 1.2 mol/L, and HNO<sub>3</sub>:

1.6 mol/L) ( $V_{[\text{HMIIm}]^+[\text{BF}_4]^-}=1\text{ mL}$ ,  $V_{\text{Au(III)}}=10\text{ mL}$ ,  $T=35^\circ\text{C}$ ,  $t=6\text{ h}$ ).

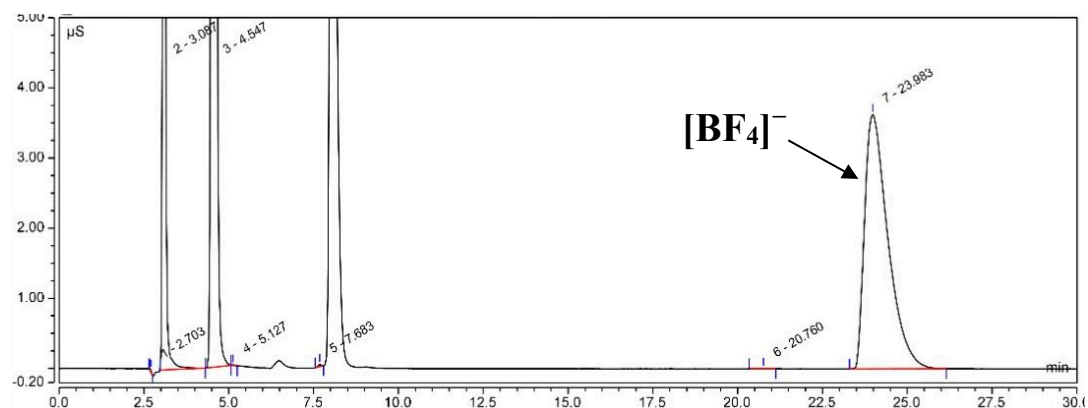

(k) The supernatant after extraction of the 300 mg/L Au(III) solutions from  $[\text{HMIIm}]^+[\text{BF}_4]^-$  (measured after dilution 1000) at aqua regia after diluted 10 times (HCl: 1.2 mol/L, and  $\text{HNO}_3$ : 1.6 mol/L) ( $V_{[\text{HMIIm}]^+[\text{BF}_4]^-}=1\text{ mL}$ ,  $V_{\text{Au(III)}}=10\text{ mL}$ ,  $T=35^\circ\text{C}$ ,  $t=6\text{ h}$ ).

3.2 The concentration of  $[\text{BF}_4]^-$  in water under different conditions

**Supplementary Table S1.** The concentration of  $[\text{BF}_4]^-$  in water under different conditions

|                                                                              | $C(\text{Au(III)})$ | Adsorption |                                     | Solvent extraction |                                     |
|------------------------------------------------------------------------------|---------------------|------------|-------------------------------------|--------------------|-------------------------------------|
|                                                                              |                     | S          | $C[\text{BF}_4]^-$ in aqueous phase | S (D=1000)         | $C[\text{BF}_4]^-$ in aqueous phase |
| pH = 2                                                                       | 150ppm              | 0.013      | 0.122                               | 1.927              | 18040                               |
|                                                                              | 300ppm              | 0.023      | 0.215                               | 1.875              | 17550                               |
| Dilute 10 times of aqua regia(HCl: 1.2 mol/L, and $\text{HNO}_3$ : 1.6mol/L) | 150ppm              | 0.209      | 1.96                                | 2.841              | 26600                               |
|                                                                              | 300ppm              | 0.201      | 1.89                                | 2.855              | 27010                               |

S: peak area, D: Dilution times.

#### 4. Effect of metal salts on Au(III) adsorption

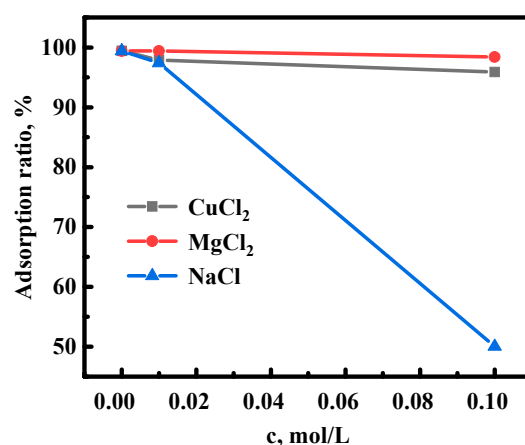

**Supplementary Figure S3.** Effect of metal salts on Au(III) adsorption ( $c_{(\text{Na}^+, \text{Mg}^{2+}, \text{Cu}^{2+})} = 0, 0.01, \text{ and } 0.1 \text{ mol/L}$ ,  $c_{\text{Au(III)}} = 60 \text{ mg/L}$ ,  $V_{\text{Au(III)}} = 20 \text{ mL}$ ,  $m_{[\text{HMI}m] + [\text{BF}_4] - @ \text{UiO-66}} = 10 \text{ mg}$ ,  $t = 6 \text{ h}$ ,  $T = 35^\circ\text{C}$ ,  $\text{pH} = 2$ ).

#### 5. Effect of the initial concentration of Au(III) on the adsorption amount of UiO-66

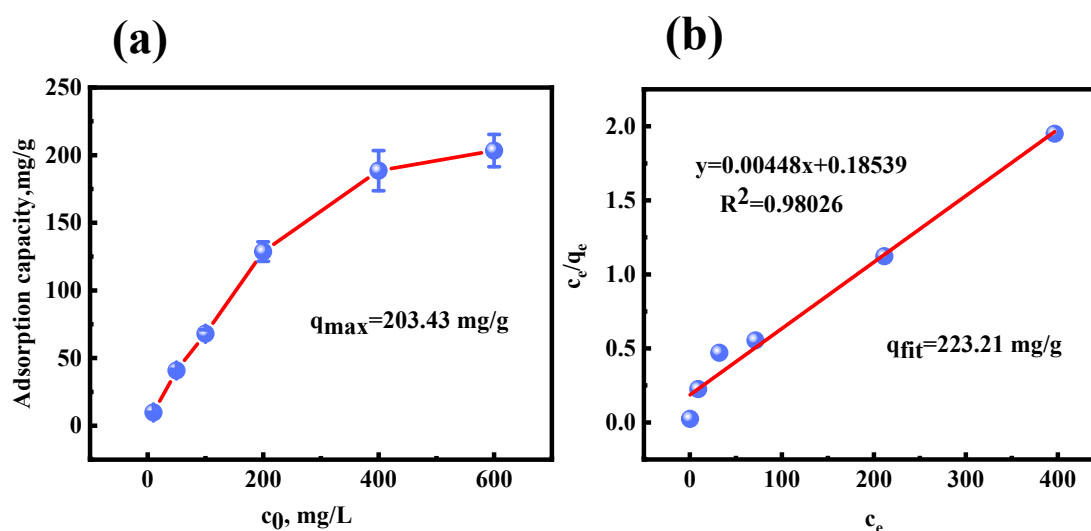

**Supplementary Figure S4.** (a) Effect of the initial Au(III) concentration on adsorption capacity of UiO-66 ( $V_{\text{Au(III)}} = 10 \text{ mL}$ ,  $m_{\text{UiO-66}} = 10 \text{ mg}$ ,  $t = 6 \text{ h}$ ,  $T = 35^\circ\text{C}$ ,  $\text{pH} = 2$ ); (b) Langmuir model fitting.

#### 6. The validation studies of Atomic Absorption Spectroscopy (AAS) and Ion Chromatography (IC)

##### 6.1 The validation studies of AAS

**Supplementary Table S2.** Method parameters for determination of metal ions by AAS.

| Metal ions | linearity range | Characteristic concentrations (mg/L) | limits of detection (mg/L) | precision |
|------------|-----------------|--------------------------------------|----------------------------|-----------|
| Au         | 0–10 mg/L       | 0.059                                | 0.016                      | 0.44%     |

|    |            |       |       |       |
|----|------------|-------|-------|-------|
| Mg | 0–0.4mg/L  | 0.022 | 0.003 | 0.79% |
| Cu | 0–5 mg/L   | 0.019 | 0.003 | 0.25% |
| Zn | 0–0.5 mg/L | 0.006 | 0.002 | 0.36% |
| Pb | 0–15 mg/L  | 0.141 | 0.029 | 0.98% |
| Ni | 0–3 mg/L   | 0.041 | 0.008 | 0.67% |
| Fe | 0–5 mg/L   | 0.042 | 0.017 | 0.83% |

**Supplementary Table S3.** Method parameters for determination of  $[\text{BF}_4]^-$  by IC.

| linearity range | limits of detection (mg/L) | Limits of quantification (mg/L) | precision |
|-----------------|----------------------------|---------------------------------|-----------|
| 0–500 mg/L      | 0.16                       | 0.6                             | 0.17      |

The standard solutions of 0, 0.5, 1, 2, 10, 50, 100, 150, 200, and 500 mg/L  $[\text{BF}_4]^-$  were configured and determined. The standard solutions were diluted a certain number of times and then sampled for analysis. The detection limits and quantitation limits were examined when the signal-to-noise ratio (S/N) was 3 and 10, respectively. Precision was calculated by measuring  $[\text{BF}_4]^-$  standard solution (50 mg/L) for 8 consecutive times under optimal conditions of the instrument.

#### 7. The technical details of AAS analytical experiments

**Supplementary Table S4.** The technical details for determination of metal ions by AAS.

| Metal ions | absorption wavelengths (nm) | Spectral bandwidth(nm) | Burner height(nm) | Air pressure (Mpa) | C <sub>2</sub> H <sub>2</sub> (Mpa, mL/min) |
|------------|-----------------------------|------------------------|-------------------|--------------------|---------------------------------------------|
| Au         | 242.8                       | 0.4                    | 6                 | 0.2                | 0.05, 1300                                  |
| Mg         | 285.2                       | 0.4                    | 6                 | 0.24               | 0.05, 1500                                  |
| Cu         | 324.7                       | 0.4                    | 5                 | 0.22               | 0.05, 1600                                  |
| Zn         | 213.9                       | 0.4                    | 6                 | 0.24               | 0.05, 1300                                  |
| Pb         | 283.3                       | 0.4                    | 6                 | 0.24               | 0.05, 1500                                  |
| Ni         | 232.0                       | 0.2                    | 6                 | 0.24               | 0.05, 1300                                  |
| Fe         | 248.3                       | 0.2                    | 10                | 0.22               | 0.05, 2300                                  |
